# Supplementary material for: Small to large-scale patterns of ground-dwelling spider (Araneae) diversity across northern Canada
Source: Atypon-hosted journal article supplement (doi:10.1139/facets-2018-0007), 2018-09-20
Supplement: facets-2018-0007_supplement1.pdf [file facets-2018-0007_supplement1.pdf]

**Table S1.** Table of sampling dates, spatial and environmental variables per site. Sites: HA=Hazen Lake, NU; IQ=Iqaluit, NU; CB=Cambridge Bay, NU; BA=Banks Island, NU; CH=Churchill, MB; SC=Schefferville, QC; TO=Tombstone mountains, YT; KU=Kugluktuk, NU; GB=Goose Bay, LB; MO=Moosonee, ON; YE=Yellowknife, NT and NW=Norman Wells, NT. Habitats: M=mescic, W=wet. The column 'days' refers to the number of sampling days. Environmental variables : mean.pd= average depth of active layer, sd.pd= standard deviation of active layer' depth, maxveght=maximum vegetation height, gramcov=cover of graminoids, moscov=cover of mosses, lichcov=cover of lichens, forbcov=cover of forbsr, shrubcov=cover of shrubs, AMT= annual mean temperature of the site, maxT= maximum temperature of the warmest month of the site, minT= minimum temperature of the coldest month of the site, AP= annual precipitation, DJA0= degree days above zero at the site, DJB0= degree day below zero at the site. Values of environmental variables from the field are an average of values from 5 or 6 traps per replicate.

| Ecoclimatic | site | Hab. | rep. | dates           | days | latitude | longitude  | mean.pd | sd.pd | maxveght | gramcov | moscov | lichcov | forbcov | shrubcov | AMT   | maxT | minT  | AP    | DJA0  | DJB0   |
|-------------|------|------|------|-----------------|------|----------|------------|---------|-------|----------|---------|--------|---------|---------|----------|-------|------|-------|-------|-------|--------|
| Arctic      | BA   | M    | 1    | 7-19 july 2011  | 12   | 73.22181 | -119.56059 | 41.66   | 6.68  | 9.16     | 3.5     | 0.83   | 0.33    | 1.5     | 0        | -13.3 | 24.9 | -48.9 | 149.4 | 456.2 | 5322.9 |
|             | BA   | M    | 2    | 7-19 july 2011  | 12   | 73.22656 | -119.57728 | 44.44   | 6.96  | 9.02     | 3.25    | 0.8    | 0.38    | 1.41    | 0        | -13.3 | 24.9 | -48.9 | 149.4 | 456.2 | 5322.9 |
|             | BA   | M    | 3    | 7-19 july 2011  | 12   | 73.22855 | -119.58662 | 48.18   | 7.67  | 8.86     | 2.95    | 0.6    | 0.45    | 1.48    | 0        | -13.3 | 24.9 | -48.9 | 149.4 | 456.2 | 5322.9 |
|             | BA   | W    | 1    | 7-19 july 2011  | 12   | 73.22412 | -119.55255 | 48.38   | 6.21  | 9.51     | 3.45    | 0.7    | 0.52    | 1.23    | 0        | -13.3 | 24.9 | -48.9 | 149.4 | 456.2 | 5322.9 |
|             | BA   | W    | 2    | 7-19 july 2011  | 12   | 73.23284 | -119.54719 | 45.27   | 6.79  | 10.26    | 3.35    | 0.82   | 0.28    | 1.27    | 0        | -13.3 | 24.9 | -48.9 | 149.4 | 456.2 | 5322.9 |
|             | BA   | W    | 3    | 7-19 july 2011  | 12   | 73.23193 | -119.58330 | 45.49   | 6.55  | 10.3     | 3.58    | 0.79   | 0.33    | 1.31    | 0        | -13.3 | 24.9 | -48.9 | 149.4 | 456.2 | 5322.9 |
|             | CB   | M    | 1    | 7-19 july 2011  | 12   | 69.11993 | -105.42065 | 31.46   | 6.36  | 15.33    | 3       | 1.33   | 0.5     | 3       | 0.66     | -14.4 | 19.9 | -44.6 | 138.8 | 599.6 | 5836.8 |
|             | CB   | M    | 2    | 7-19 july 2011  | 12   | 69.12070 | -105.42582 | 30.04   | 5.79  | 15.55    | 3       | 1.05   | 0.58    | 3.16    | 0.61     | -14.4 | 19.9 | -44.6 | 138.8 | 599.6 | 5836.8 |
|             | CB   | M    | 3    | 7-19 july 2011  | 12   | 69.12157 | -105.43124 | 29.88   | 5.98  | 15.81    | 3.16    | 1.06   | 0.51    | 3.02    | 0.54     | -14.4 | 19.9 | -44.6 | 138.8 | 599.6 | 5836.8 |
|             | CB   | W    | 1    | 7-19 july 2011  | 12   | 69.12177 | -105.41688 | 30.66   | 5.09  | 16.78    | 3.36    | 1.07   | 0.43    | 2.86    | 0.63     | -14.4 | 19.9 | -44.6 | 138.8 | 599.6 | 5836.8 |
|             | CB   | W    | 2    | 7-19 july 2011  | 12   | 69.12225 | -105.42191 | 34.01   | 5.14  | 17.91    | 3.58    | 1.25   | 0.33    | 2.67    | 0.74     | -14.4 | 19.9 | -44.6 | 138.8 | 599.6 | 5836.8 |
|             | CB   | W    | 3    | 7-19 july 2011  | 12   | 69.12366 | -105.42531 | 34.21   | 5.26  | 17.06    | 3.51    | 1.29   | 0.39    | 2.95    | 0.86     | -14.4 | 19.9 | -44.6 | 138.8 | 599.6 | 5836.8 |
|             | HA   | M    | 1    | 19-28 july 2010 | 9    | 81.83216 | -71.45594  | 23.24   | 3.39  | 18.4     | 4.2     | 3.4    | 0       | 1.4     | 1.2      | -19.7 | 18.5 | -45.4 | 75.5  | 359.2 | 7516.2 |
|             | HA   | M    | 2    | 19-28 july 2010 | 9    | 81.82941 | -71.48788  | 22.88   | 3.36  | 17.08    | 4.04    | 3.08   | 0       | 1.68    | 1.24     | -19.7 | 18.5 | -45.4 | 75.5  | 359.2 | 7516.2 |
|             | HA   | M    | 3    | 19-28 july 2010 | 9    | 81.83171 | -71.45110  | 27.33   | 3.37  | 18.12    | 4.31    | 4.12   | 0       | 1.27    | 1.11     | -19.7 | 18.5 | -45.4 | 75.5  | 359.2 | 7516.2 |
|             | HA   | W    | 1    | 19-28 july 2010 | 9    | 81.82975 | -71.32244  | 27.33   | 3.37  | 18.12    | 4.31    | 4.12   | 0       | 1.27    | 1.11     | -19.7 | 18.5 | -45.4 | 75.5  | 359.2 | 7516.2 |
|             | HA   | W    | 2    | 19-28 july 2010 | 9    | 81.82911 | -71.49242  | 23.71   | 3.13  | 18.34    | 4.37    | 3.94   | 0       | 1.12    | 1.13     | -19.7 | 18.5 | -45.4 | 75.5  | 359.2 | 7516.2 |

| Ecoclimatic | site | Hab. | rep. | dates                 | days | latitude | longitude  | mean.pd | sd.pd | maxveght | gramcov | moscov | lichcov | forbcov | shrubcov | AMT   | maxT | minT  | AP    | DJA0   | DJB0   |
|-------------|------|------|------|-----------------------|------|----------|------------|---------|-------|----------|---------|--------|---------|---------|----------|-------|------|-------|-------|--------|--------|
|             | HA   | W    | 3    | 19-28 july 2010       | 9    | 81.83179 | -71.44115  | 24.9    | 3.32  | 18.01    | 4.24    | 3.73   | 0       | 1.34    | 1.15     | -19.7 | 18.5 | -45.4 | 75.5  | 359.2  | 7516.2 |
|             | IQ   | M    | 1    | 17-29 july 2010       | 12   | 63.79113 | -68.57375  | 13.32   | 8.38  | 20.6     | 1.6     | 4.4    | 4.2     | 2.6     | 0        | -9.8  | 219  | -34.3 | 412   | 653.8  | 4196.5 |
|             | IQ   | M    | 2    | 17-29 july 2010       | 12   | 63.77830 | -68.54961  | 10.96   | 4.7   | 18.4     | 1.2     | 2.8    | 4       | 3       | 0        | -9.8  | 219  | -34.3 | 412   | 653.8  | 4196.5 |
|             | IQ   | M    | 3    | 17-29 july 2010       | 12   | 63.75117 | -68.45898  | 11      | 6.21  | 21.6     | 2       | 2.8    | 2.6     | 3.8     | 0        | -9.8  | 219  | -34.3 | 412   | 653.8  | 4196.5 |
|             | IQ   | W    | 1    | 17-29 july 2010       | 12   | 63.76144 | -68.57352  | 25.76   | 13.81 | 24.6     | 5       | 1.6    | 0       | 1.4     | 0.8      | -9.8  | 219  | -34.3 | 412   | 653.8  | 4196.5 |
|             | IQ   | W    | 2    | 17-29 july 2010       | 12   | 63.75672 | -68.56770  | 29.48   | 10.86 | 24.8     | 4       | 4.4    | 1.8     | 2.2     | 0        | -9.8  | 219  | -34.3 | 412   | 653.8  | 4196.5 |
|             | IQ   | W    | 3    | 17-29 july 2010       | 12   | 63.75122 | -68.45927  | 40.72   | 20.11 | 24.2     | 4.4     | 3.4    | 1       | 3.2     | 0        | -9.8  | 219  | -34.3 | 412   | 653.8  | 4196.5 |
|             | CH   | M    | 1    | 1-13 july 2010        | 12   | 58.73351 | -93.79792  | 24.3    | 5.53  | 17.5     | 2.2     | 2.2    | 3.6     | 3.8     | 0.6      | -6.9  | 23.9 | -35.8 | 431.6 | 1204.9 | 3681.3 |
|             | CH   | M    | 2    | 1-13 july 2010        | 12   | 58.73235 | -93.79028  | 21.86   | 3.86  | 16       | 2.04    | 1.84   | 3.92    | 3.96    | 0.72     | -6.9  | 23.9 | -35.8 | 431.6 | 1204.9 | 3681.3 |
|             | CH   | M    | 3    | 1-13 july 2010        | 12   | 58.72235 | -93.83991  | 22.43   | 3.88  | 16.2     | 2.24    | 2      | 3.9     | 3.95    | 0.86     | -6.9  | 23.9 | -35.8 | 431.6 | 1204.9 | 3681.3 |
|             | CH   | W    | 1    | 1-13 july 2010        | 12   | 58.73573 | -93.79789  | 24.41   | 4.15  | 16.44    | 2.09    | 2      | 3.88    | 3.94    | 0.43     | -6.9  | 23.9 | -35.8 | 431.6 | 1204.9 | 3681.3 |
|             | CH   | W    | 2    | 1-13 july 2010        | 12   | 58.73034 | -93.79509  | 24.2    | 3.9   | 16.22    | 1.91    | 1.81   | 3.86    | 3.73    | 0.52     | -6.9  | 23.9 | -35.8 | 431.6 | 1204.9 | 3681.3 |
|             | CH   | W    | 3    | 1-13 july 2010        | 12   | 58.65735 | -93.83104  | 23.44   | 4.27  | 16.47    | 2.1     | 1.97   | 3.83    | 3.87    | 0.62     | -6.9  | 23.9 | -35.8 | 431.6 | 1204.9 | 3681.3 |
|             | KU   | M    | 1    | 22 june - 2 july 2011 | 11   | 67.78182 | -115.27699 | 17.5    | 7.57  | 59.5     | 0.33    | 2.66   | 1.33    | 1.66    | 3.33     | -10.6 | 28.9 | -41.4 | 249.3 | 887.5  | 4728.1 |
|             | KU   | M    | 2    | 22 june - 2 july 2011 | 11   | 67.83565 | -115.20968 | 23.3    | 5.85  | 35.33    | 0.5     | 1.83   | 2.5     | 0.16    | 4.66     | -10.6 | 28.9 | -41.4 | 249.3 | 887.5  | 4728.1 |
|             | KU   | M    | 3    | 22 june - 2 july 2011 | 11   | 67.83427 | -115.21136 | 18.53   | 4.75  | 27.33    | 1.5     | 2.16   | 3.33    | 0.33    | 4.66     | -10.6 | 28.9 | -41.4 | 249.3 | 887.5  | 4728.1 |
|             | KU   | W    | 1    | 22 june - 2 july 2011 | 11   | 67.78157 | -115.27824 | 15.16   | 6.04  | 30.33    | 4.16    | 3.16   | 1.83    | 0.5     | 2.33     | -10.6 | 28.9 | -41.4 | 249.3 | 887.5  | 4728.1 |
|             | KU   | W    | 2    | 22 june - 2 july 2011 | 11   | 67.83396 | -115.21370 | 18.46   | 3.47  | 25.33    | 3.66    | 3.83   | 3.33    | 0.83    | 1.83     | -10.6 | 28.9 | -41.4 | 249.3 | 887.5  | 4728.1 |
|             | KU   | W    | 3    | 22 june - 2 july 2011 | 11   | 67.83617 | -115.20895 | 22.63   | 7.04  | 32.33    | 4.33    | 3.66   | 2.33    | 1       | 1.83     | -10.6 | 28.9 | -41.4 | 249.3 | 887.5  | 4728.1 |
|             | SC   | M    | 1    | 30 june-9 july 2010   | 9    | 54.90526 | -67.15049  | 57.64   | 9.81  | 47.6     | 0.6     | 2      | 2       | 1       | 2.6      | -5.3  | 25.7 | -35.7 | 822.9 | 1270.1 | 3163.6 |
|             | SC   | M    | 2    | 30 june-9 july 2010   | 9    | 54.90414 | -67.14888  | 50.36   | 9.1   | 50.12    | 0.72    | 1.8    | 2.4     | 1       | 2.52     | -5.3  | 25.7 | -35.7 | 822.9 | 1270.1 | 3163.6 |
|             | SC   | M    | 3    | 30 june-9 july 2010   | 9    | 54.90310 | -67.14765  | 59.68   | 9.65  | 50.54    | 0.86    | 2.16   | 1.88    | 1       | 2.62     | -5.3  | 25.7 | -35.7 | 822.9 | 1270.1 | 3163.6 |
|             | SC   | W    | 1    | 30 june-9 july 2010   | 9    | 54.75970 | -66.71120  | 71.13   | 11.08 | 50.65    | 1.03    | 2.59   | 1.25    | 1       | 2.54     | -5.3  | 25.7 | -35.7 | 822.9 | 1270.1 | 3163.6 |
|             | SC   | W    | 2    | 30 june-9 july 2010   | 9    | 54.85262 | -66.66897  | 65.36   | 13.29 | 52.78    | 1.24    | 2.11   | 1.5     | 0.8     | 2.65     | -5.3  | 25.7 | -35.7 | 822.9 | 1270.1 | 3163.6 |
|             | SC   | W    | 3    | 30 june-9 july 2010   | 9    | 54.85350 | -66.67043  | 60.83   | 10.59 | 50.34    | 0.89    | 2.13   | 1.8     | 0.96    | 2.59     | -5.3  | 25.7 | -35.7 | 822.9 | 1270.1 | 3163.6 |
|             | TO   | M    | 1    | 21 june-1 july 2011   | 10   | 64.60560 | -138.36143 | 22.83   | 5.42  | 30.83    | 3       | 2.83   | 2.33    | 1.5     | 1.5      | -4.4  | 27   | -50   | 324.3 | 1817.9 | 3395.1 |

Subarctic

| Ecoclimatic | site | Hab. | rep. | dates               | days | latitude | longitude  | mean.pd | sd.pd | maxveght | gramcov | moscov | lichcov | forbcov | shrubcov | AMT  | maxT | minT  | AP    | DJA0   | DJB0   |
|-------------|------|------|------|---------------------|------|----------|------------|---------|-------|----------|---------|--------|---------|---------|----------|------|------|-------|-------|--------|--------|
|             | TO   | M    | 2    | 21 june-1 july 2011 | 10   | 64.59915 | -138.30611 | 22.8    | 5.2   | 30.13    | 3.16    | 2.8    | 2.05    | 1.58    | 1.41     | -4.4 | 27   | -50   | 324.3 | 1817.9 | 3395.1 |
|             | TO   | M    | 3    | 21 june-1 july 2011 | 10   | 64.58353 | -138.26843 | 22.43   | 4.75  | 28.49    | 2.86    | 2.93   | 2.39    | 1.68    | 1.31     | -4.4 | 27   | -50   | 324.3 | 1817.9 | 3395.1 |
|             | TO   | W    | 1    | 21 june-1 july 2011 | 10   | 64.60629 | -138.35637 | 22.34   | 4.59  | 28.24    | 2.67    | 3.09   | 2.63    | 1.62    | 1.2      | -4.4 | 27   | -50   | 324.3 | 1817.9 | 3395.1 |
|             | TO   | W    | 2    | 21 june-1 july 2011 | 10   | 64.59736 | -138.31009 | 22.23   | 4.62  | 28.78    | 2.78    | 2.94   | 2.56    | 1.73    | 1.4      | -4.4 | 27   | -50   | 324.3 | 1817.9 | 3395.1 |
|             | TO   | W    | 3    | 21 june-1 july 2011 | 10   | 64.57942 | -138.28212 | 22.94   | 4.93  | 28.58    | 2.91    | 2.77   | 2.66    | 1.68    | 1.3      | -4.4 | 27   | -50   | 324.3 | 1817.9 | 3395.1 |
|             | GB   | M    | 1    | 15-24 june 2010     | 9    | 53.31890 | -60.29594  | 58.2    | 10.06 | 36       | 0.4     | 2.4    | 2       | 0       | 2.6      | -0.5 | 31.4 | -26   | 949   | 1856.7 | 2025.4 |
|             | GB   | M    | 2    | 15-24 june 2010     | 9    | 53.32036 | -60.29691  | 49.84   | 12.07 | 38.2     | 0.28    | 1.88   | 2.4     | 0       | 2.72     | -0.5 | 31.4 | -26   | 949   | 1856.7 | 2025.4 |
|             | GB   | M    | 3    | 15-24 june 2010     | 9    | 53.32035 | -60.29268  | 53.2    | 13.59 | 39.84    | 0.33    | 2.25   | 1.88    | 0       | 3.06     | -0.5 | 31.4 | -26   | 949   | 1856.7 | 2025.4 |
|             | GB   | W    | 1    | 15-24 june 2010     | 9    | 53.21199 | -60.45062  | 58.64   | 15.74 | 37.8     | 0.4     | 2.7    | 1.25    | 0       | 3.27     | -0.5 | 31.4 | -26   | 949   | 1856.7 | 2025.4 |
|             | GB   | W    | 2    | 15-24 june 2010     | 9    | 53.21408 | -60.45044  | 57.57   | 14.33 | 40.36    | 0.28    | 2.24   | 1.5     | 0       | 3.33     | -0.5 | 31.4 | -26   | 949   | 1856.7 | 2025.4 |
|             | GB   | W    | 3    | 15-24 june 2010     | 9    | 53.21620 | -60.45001  | 55.49   | 13.16 | 38.44    | 0.34    | 2.29   | 1.8     | 0       | 2.99     | -0.5 | 31.4 | -26   | 949   | 1856.7 | 2025.4 |
|             | MO   | M    | 1    | 17-26 june 2010     | 9    | 51.24622 | -80.67281  | 100     | 0     | 65       | 5       | 2.4    | 0       | 1.2     | 0.4      | -1.1 | 30.6 | -33   | 681.6 | 1959.1 | 2339.3 |
|             | MO   | M    | 2    | 17-26 june 2010     | 9    | 51.24466 | -80.67767  | 100     | 0     | 65       | 5       | 2.28   | 0       | 1.04    | 0.48     | -1.1 | 30.6 | -33   | 681.6 | 1959.1 | 2339.3 |
|             | MO   | M    | 3    | 17-26 june 2010     | 9    | 51.24690 | -80.68102  | 100     | 0     | 65       | 5       | 2.13   | 0       | 0.84    | 0.57     | -1.1 | 30.6 | -33   | 681.6 | 1959.1 | 2339.3 |
|             | MO   | W    | 1    | 15-25 june 2010     | 10   | 51.28034 | -80.64252  | 100     | 0     | 58       | 5       | 2.56   | 0       | 0.81    | 0.29     | -1.1 | 30.6 | -33   | 681.6 | 1959.1 | 2339.3 |
| N-Boreal    | MO   | W    | 2    | 16-25 june 2010     | 9    | 51.28288 | -80.63926  | 100     | 0     | 57.6     | 5       | 2.27   | 0       | 0.98    | 0.34     | -1.1 | 30.6 | -33   | 681.6 | 1959.1 | 2339.3 |
|             | MO   | W    | 3    | 16-25 june 2010     | 9    | 51.27717 | -80.64778  | 100     | 0     | 62.12    | 5       | 2.33   | 0       | 0.97    | 0.41     | -1.1 | 30.6 | -33   | 681.6 | 1959.1 | 2339.3 |
|             | NW   | M    | 1    | 7-17 june 2010      | 10   | 65.29204 | -126.63725 | 38.1    | 4.2   | 46.66    | 1.66    | 2.5    | 0.66    | 1.16    | 1.5      | -5.5 | 28.7 | -44.2 | 290.7 | 1860.2 | 3844   |
|             | NW   | M    | 2    | 7-17 june 2010      | 10   | 65.26694 | -126.72827 | 39.25   | 4.63  | 44.44    | 1.44    | 2.41   | 0.77    | 1.19    | 1.41     | -5.5 | 28.7 | -44.2 | 290.7 | 1860.2 | 3844   |
|             | NW   | M    | 3    | 7-17 june 2010      | 10   | 65.30494 | -126.70873 | 36.42   | 4.44  | 46.01    | 0.85    | 2.81   | 0.9     | 1.22    | 1.48     | -5.5 | 28.7 | -44.2 | 290.7 | 1860.2 | 3844   |
|             | NW   | W    | 1    | 7-17 june 2010      | 10   | 65.29112 | -126.62262 | 39.66   | 4.87  | 46.52    | 0.99    | 2.45   | 1.05    | 1.26    | 1.56     | -5.5 | 28.7 | -44.2 | 290.7 | 1860.2 | 3844   |
|             | NW   | W    | 2    | 7-17 june 2010      | 10   | 65.25226 | -126.66128 | 31.8    | 5.16  | 48.44    | 0.99    | 2.86   | 1.23    | 1.3     | 1.49     | -5.5 | 28.7 | -44.2 | 290.7 | 1860.2 | 3844   |
|             | NW   | W    | 3    | 7-17 june 2010      | 10   | 65.28901 | -126.84077 | 33.94   | 4.63  | 50.51    | 1.15    | 2.84   | 0.94    | 1.36    | 1.57     | -5.5 | 28.7 | -44.2 | 290.7 | 1860.2 | 3844   |
|             | YE   | M    | 1    | 7-18 june 2011      | 11   | 62.51070 | -113.39479 | 13.66   | 3.76  | 45.83    | 2.5     | 1.33   | 1.83    | 0.16    | 2        | -4.6 | 27.3 | -41.7 | 280.7 | 1835.5 | 3475.4 |
|             | YE   | M    | 2    | 7-18 june 2011      | 11   | 62.50293 | -113.40479 | 9.57    | 3.65  | 44.8     | 2.08    | 1.05   | 2.13    | 0.19    | 2        | -4.6 | 27.3 | -41.7 | 280.7 | 1835.5 | 3475.4 |
|             | YE   | M    | 3    | 7-18 june 2011      | 11   | 62.50714 | -113.39443 | 9.1     | 3.09  | 40.6     | 1.59    | 1.23   | 2.49    | 0.22    | 1.83     | -4.6 | 27.3 | -41.7 | 280.7 | 1835.5 | 3475.4 |

| Ecoclimatic | site | Hab. | rep. | dates          | days | latitude | longitude  | mean.pd | sd.pd | maxveght | gramcov | moscov | lichcov | forbcov | shrbcov | AMT  | maxT | minT  | AP    | DJA0   | DJB0   |
|-------------|------|------|------|----------------|------|----------|------------|---------|-------|----------|---------|--------|---------|---------|---------|------|------|-------|-------|--------|--------|
| YE          | W    | 1    |      | 7-18 june 2011 | 11   | 62.52110 | -113.38174 | 10.25   | 3.47  | 47.04    | 1.86    | 1.27   | 2.24    | 0.26    | 2.13    | -4.6 | 27.3 | -41.7 | 280.7 | 1835.5 | 3475.4 |
| YE          | W    | 2    |      | 7-18 june 2011 | 11   | 62.51923 | -113.38494 | 11.16   | 3.66  | 53.21    | 2.17    | 0.98   | 2.11    | 0.14    | 2.32    | -4.6 | 27.3 | -41.7 | 280.7 | 1835.5 | 3475.4 |
| YE          | W    | 3    |      | 7-18 june 2011 | 11   | 62.51591 | -113.39146 | 12.16   | 3.66  | 58.58    | 2.53    | 1.14   | 1.8     | 0.16    | 2.05    | -4.6 | 27.3 | -41.7 | 280.7 | 1835.5 | 3475.4 |
