# Supplementary material for: Small to large-scale patterns of ground-dwelling spider (Araneae) diversity across northern Canada
Source: Atypon-hosted journal article supplement (doi:10.1139/facets-2018-0007), 2018-09-20
Supplement: facets-2018-0007_supplement2.pdf [file facets-2018-0007_supplement2.pdf]

**Table S2.** Pooled number of individuals and species collected in pitfall and yellow pan traps by the Northern Biodiversity Program during the summer 2010 and 2011 in 12 sites in Northern Canada. Sites: BA=Banks Island, NU; CB=Cambridge Bay, NU; HA=Hazen Lake, NU; IQ=Iqaluit, NU; CH=Churchill, MB; KU=Kugluktuk, NU; SC=Schefferville, QC; TO=Tombstone mountains, YT; GB=Goose Bay, LB; MO=Moosonee, ON; NW=Norman Wells, NT and YE=Yellowknife, NT.

| Family       | Species                                    | Arctic |    |    |    | Subarctic |    |    |    | North-boreal |    |    |    | New provincial and territorial record |
|--------------|--------------------------------------------|--------|----|----|----|-----------|----|----|----|--------------|----|----|----|---------------------------------------|
|              |                                            | BA     | CB | HA | IQ | CH        | KU | SC | TO | GB           | MO | NW | YE |                                       |
| Amaurobiidae | <i>Cybaeopsis euopla</i> (Bishop & Crosby) |        |    |    |    |           |    | 8  |    | 9            | 12 | 1  |    |                                       |
| Araneidae    | <i>Aculepeira packardii</i> (Thorell)      |        |    |    |    |           |    |    |    | 1            |    |    |    |                                       |
| Araneidae    | <i>Araneus groenlandicola</i> (Strand)     |        |    |    |    | 1         |    |    |    |              |    |    |    |                                       |
| Araneidae    | <i>Hypsosinga groenlandica</i> (Simon)     |        |    |    |    | 1         |    |    | 17 |              |    | 2  |    | MB                                    |
| Araneidae    | <i>Hypsosinga pygmaea</i> (Sundevall)      |        |    |    |    |           |    | 7  |    | 1            |    | 1  | 1  |                                       |
| Araneidae    | <i>Hypsosinga rubens</i> (Hentz)           |        |    |    |    |           |    |    |    | 1            |    | 9  | 4  |                                       |
| Araneidae    | <i>Larinioides cornutus</i> (Clerck)       |        |    |    |    |           |    |    |    | 1            | 1  |    |    |                                       |
| Clubionidae  | <i>Clubiona bryantae</i> (Gertsch)         |        |    |    |    | 1         |    | 4  |    | 1            | 11 | 1  | 26 |                                       |
| Clubionidae  | <i>Clubiona furcata</i> (Emerton)          |        |    |    |    |           |    |    | 1  |              | 1  |    |    |                                       |
| Clubionidae  | <i>Clubiona kulczynskii</i> (Lessert)      |        |    |    |    |           |    |    |    |              | 2  |    |    |                                       |
| Clubionidae  | <i>Clubiona norvegica</i> (Strand)         |        |    |    |    |           |    |    |    |              | 1  | 1  |    |                                       |
| Clubionidae  | <i>Clubiona opeongo</i> (Edwards)          |        |    |    |    |           |    |    |    | 1            |    |    |    | LB                                    |
| Clubionidae  | <i>Clubiona praematura</i> (Emerton)       |        |    |    |    | 2         |    |    |    |              |    |    |    |                                       |
| Clubionidae  | <i>Clubiona riparia</i> (L.Koch)           |        |    |    |    |           |    |    |    |              | 1  |    |    |                                       |
| Clubionidae  | <i>Clubiona trivialis</i> (C.L.Koch)       |        |    |    |    |           |    |    | 1  |              |    |    |    | NU                                    |
| Dictynidae   | <i>Arctella lapponica</i> (Holm)           |        |    |    |    |           | 5  |    | 2  |              |    |    |    | NU                                    |
| Dictynidae   | <i>Argenna obesa</i> (Emerton)             |        |    |    |    |           |    |    |    |              | 5  | 85 | 14 | NT                                    |
| Dictynidae   | <i>Dictyna arundinacea</i> (Linnaeus)      |        |    |    |    |           |    |    |    | 3            |    |    |    |                                       |
| Dictynidae   | <i>Dictyna brevitarsa</i> (Emerton)        |        |    |    |    |           |    |    |    | 1            |    | 1  |    |                                       |
| Dictynidae   | <i>Dictyna major</i> (Menge)               |        |    |    |    |           |    |    |    |              | 1  |    |    |                                       |
| Dictynidae   | <i>Emblyna annulipes</i> (Blackwall)       |        |    |    | 1  |           |    |    |    |              | 3  | 8  |    | NU                                    |
| Dictynidae   | <i>Emblyna borealis</i> (O.P.-Cambridge)   |        | 29 | 3  |    |           |    | 2  |    |              |    |    |    |                                       |
| Dictynidae   | <i>Emblyna phylax</i> (Gertsch & Ivie)     |        |    |    |    |           |    |    |    | 1            |    |    |    | LB                                    |
| Dictynidae   | <i>Lathys pallida</i> (Marx)               |        |    |    |    |           |    |    |    |              |    | 1  |    | NT                                    |
| Gnaphosidae  | <i>Callilepis pluto</i> (Banks)            |        |    |    |    |           |    |    |    |              |    |    | 25 |                                       |
| Gnaphosidae  | <i>Drassodes mirus</i> (Platnick & Shadab) |        |    |    |    | 1         |    |    |    |              |    |    | 2  | NT, MB                                |
| Gnaphosidae  | <i>Drassodes neglectus</i> (Keyserling)    |        |    |    |    |           |    |    |    |              |    | 6  | 6  |                                       |
| Gnaphosidae  | <i>Gnaphosa borea</i> (Kulczyński)         |        |    |    |    | 15        | 80 |    | 32 | 5            |    | 26 | 17 | NU                                    |
| Gnaphosidae  | <i>Gnaphosa brumalis</i> (Thorell)         |        |    |    |    |           | 5  | 26 |    | 2            | 4  | 1  |    |                                       |
| Gnaphosidae  | <i>Gnaphosa microps</i> (Holm)             |        |    |    |    | 6         |    | 4  | 39 | 1            | 10 | 5  |    |                                       |
| Gnaphosidae  | <i>Gnaphosa muscorum</i> (L.Koch)          |        |    |    |    | 2         |    | 7  |    |              |    | 13 | 12 |                                       |
| Gnaphosidae  | <i>Gnaphosa orites</i> (Chamberlin)        |        |    |    |    | 38        | 5  |    | 1  |              |    |    |    | MB                                    |
| Gnaphosidae  | <i>Gnaphosa parvula</i> (Banks)            |        |    |    |    | 1         |    | 1  |    | 2            | 11 | 6  |    |                                       |
| Gnaphosidae  | <i>Haplodrassus eunis</i> (Chamberlin)     |        |    |    |    |           |    |    |    | 13           |    | 8  | 3  | NT                                    |
| Gnaphosidae  | <i>Haplodrassus hiemalis</i> (Emerton)     |        |    |    |    | 6         | 9  |    | 57 | 3            |    | 14 | 23 |                                       |
| Gnaphosidae  | <i>Haplodrassus signifer</i> (C.L.Koch)    |        |    |    |    |           |    | 22 | 1  | 9            |    | 6  |    | NT                                    |
| Gnaphosidae  | <i>Micaria aenea</i> (Thorell)             |        |    |    |    |           |    |    |    | 11           |    | 15 | 6  |                                       |
| Gnaphosidae  | <i>Micaria alpina</i> (L.Koch)             |        |    |    |    | 17        |    |    | 15 |              |    | 1  |    |                                       |
| Gnaphosidae  | <i>Micaria constricta</i> (Emerton)        |        |    |    |    | 5         |    |    |    |              |    |    |    |                                       |
| Gnaphosidae  | <i>Micaria pulicaria</i> (Sundevall)       |        |    |    |    | 6         |    |    | 1  | 2            |    | 5  | 19 |                                       |
| Gnaphosidae  | <i>Micaria rossica</i> (Thorell)           |        |    |    |    |           |    |    |    |              |    | 20 | 10 |                                       |
| Gnaphosidae  | <i>Sergiolus montanus</i> (Emerton)        |        |    |    |    |           |    |    |    |              |    | 1  |    |                                       |

| Family      | Species                                           | Arctic |    |    |    | Subarctic |    |    |    | North-boreal |    |    |                | New provincial and territorial record |
|-------------|---------------------------------------------------|--------|----|----|----|-----------|----|----|----|--------------|----|----|----------------|---------------------------------------|
|             |                                                   | BA     | CB | HA | IQ | CH        | KU | SC | TO | GB           | MO | NW | YE             |                                       |
| Gnaphosidae | <i>Zelotes fratris</i> (Chamberlin)               |        |    |    |    | 2         |    |    |    | 11           | 13 | 12 |                |                                       |
| Gnaphosidae | <i>Zelotes puritanus</i> (Chamberlin)             |        |    |    |    |           |    |    |    |              | 8  | 7  |                |                                       |
| Gnaphosidae | <i>Zelotes sula</i> (Lowrie & Gertsch)            |        |    |    |    | 5         |    |    |    | 1            |    |    |                |                                       |
| Hahniidae   | <i>Antistea brunnea</i> (Emerton)                 |        |    |    |    |           |    |    |    |              | 12 |    |                |                                       |
| Hahniidae   | <i>Cicurina brevis</i> (Emerton)                  |        |    |    |    |           |    |    |    |              | 1  |    |                |                                       |
| Hahniidae   | <i>Hahnia cinerea</i> (Emerton)                   |        |    |    |    |           |    |    |    | 1            |    | 1  | NT             |                                       |
| Hahniidae   | <i>Hahnia glacialis</i> (Sørensen)                |        |    |    |    |           |    | 20 |    |              | 6  |    | NT             |                                       |
| Hahniidae   | <i>Hahnia ononidum</i> (Simon)                    |        |    |    |    |           |    |    |    |              | 8  | 1  |                |                                       |
| Hahniidae   | <i>Neoantistea agilis</i> (Keyserling)            |        |    |    |    |           |    |    |    | 13           |    |    | LB             |                                       |
| Hahniidae   | <i>Neoantistea magna</i> (Keyserling)             |        |    |    |    |           |    |    |    |              | 17 |    |                |                                       |
| Linyphiidae | <i>Agyneta allosubtilis</i> (Loksa)               |        |    |    |    |           |    |    | 6  |              | 3  | 3  | NT             |                                       |
| Linyphiidae | <i>Agyneta amersaxatilis</i> (Saaristo & Koponen) |        | 2  |    |    | 2         | 1  | 8  |    |              | 1  | 2  | NU, NT         |                                       |
| Linyphiidae | <i>Agyneta fabra</i> (Keyserling)                 |        |    |    |    | 21        |    |    |    |              |    |    |                |                                       |
| Linyphiidae | <i>Agyneta jacksoni</i> (Braendegaard)            |        |    |    |    | 11        |    | 79 | 17 | 1            | 3  | 8  | MB, LB, ON, NT |                                       |
| Linyphiidae | <i>Agyneta maritima</i> (Emerton)                 | 10     | 5  |    |    |           | 3  | 1  |    |              |    |    |                |                                       |
| Linyphiidae | <i>Agyneta nigripes</i> (Simon)                   | 1      |    |    | 1  |           |    |    |    |              |    |    |                |                                       |
| Linyphiidae | <i>Agyneta olivacea</i> (Emerton)                 |        | 2  |    |    |           |    | 43 | 1  | 1            | 2  | 22 | 74             | NU                                    |
| Linyphiidae | <i>Agyneta simplex</i> (Emerton)                  |        |    |    |    | 1         | 1  | 96 | 1  | 89           | 40 | 25 | NU, LB         |                                       |
| Linyphiidae | <i>Agyneta sp.1</i>                               |        |    |    |    | 23        | 58 |    | 33 |              |    | 1  |                |                                       |
| Linyphiidae | <i>Aphileta misera</i> (O.P.-Cambridge)           |        |    |    |    |           |    |    |    | 1            | 21 |    | LB             |                                       |
| Linyphiidae | <i>Arcterigone pilifrons</i> (L.Koch)             | 17     |    |    | 7  |           |    |    |    |              |    |    |                |                                       |
| Linyphiidae | <i>Baryphyma trifrons</i> (O.P.-Cambridge)        |        |    |    |    |           |    | 2  |    |              |    |    |                |                                       |
| Linyphiidae | <i>Bathyphantes brevipes</i> (Emerton)            |        |    |    |    |           |    |    |    |              | 1  |    | ON             |                                       |
| Linyphiidae | <i>Bathyphantes brevis</i> (Emerton)              |        |    |    |    |           |    |    |    |              | 3  |    |                |                                       |
| Linyphiidae | <i>Bathyphantes canadensis</i> (Emerton)          |        |    |    |    |           |    |    |    |              | 3  |    |                |                                       |
| Linyphiidae | <i>Bathyphantes eumenis</i> (L.Koch)              |        |    |    | 1  |           |    | 19 | 4  |              |    |    | NU             |                                       |
| Linyphiidae | <i>Bathyphantes gracilis</i> (Blackwall)          |        |    |    |    |           |    |    |    |              |    | 1  | NT             |                                       |
| Linyphiidae | <i>Bathyphantes pallidus</i> (Banks)              |        |    |    |    | 2         |    |    |    |              | 3  | 15 |                |                                       |
| Linyphiidae | <i>Carorita limnaea</i> (Crosby & Bishop)         |        |    |    |    |           |    |    |    | 8            | 3  | 4  | 1              | NT                                    |
| Linyphiidae | <i>Centromerus longibulbus</i> (Emerton)          |        |    |    |    |           |    | 23 |    | 19           | 1  |    |                |                                       |
| Linyphiidae | <i>Ceraticelus bulbosus</i> (Emerton)             |        |    |    |    | 2         |    | 36 |    |              | 5  | 6  | 6              |                                       |
| Linyphiidae | <i>Ceraticelus crassiceps</i> (Chamberlin & Ivie) |        |    |    |    | 3         |    | 8  |    |              |    | 2  | NT             |                                       |
| Linyphiidae | <i>Ceraticelus emertoni</i> (O.P.-Cambridge)      |        |    |    |    |           |    |    |    |              | 1  |    |                |                                       |
| Linyphiidae | <i>Ceraticelus laetabilis</i> (O.P.-Cambridge)    |        |    |    |    |           |    |    |    |              | 1  |    |                |                                       |
| Linyphiidae | <i>Ceraticelus laetus</i> (O.P.-Cambridge)        |        |    |    |    |           |    |    |    |              | 1  |    |                |                                       |
| Linyphiidae | <i>Ceraticelus rowensis</i> (Levi & Levi)         |        |    |    |    |           |    |    |    |              |    | 1  | NT             |                                       |
| Linyphiidae | <i>Ceraticelus silus</i> (Dondale)                |        |    |    |    |           |    | 3  |    |              |    |    |                |                                       |
| Linyphiidae | <i>Ceraticelus similis</i> (Banks)                |        |    |    |    |           |    |    |    |              | 24 |    |                |                                       |
| Linyphiidae | <i>Ceraticelus sp.1</i>                           |        |    |    |    |           |    |    |    |              |    | 2  |                |                                       |
| Linyphiidae | <i>Ceratinella brunnea</i> (Emerton)              |        |    |    |    | 1         |    | 9  | 1  | 3            | 12 | 1  | NT, YT         |                                       |
| Linyphiidae | <i>Ceratinella buna</i> (Chamberlin)              |        |    |    |    |           |    | 3  |    |              |    |    |                |                                       |
| Linyphiidae | <i>Ceratinella ornatula</i> (Crosby & Bishop)     |        |    |    |    |           |    | 5  |    |              | 2  |    |                |                                       |
| Linyphiidae | <i>Ceratinella parvula</i> (Fox)                  |        |    |    |    |           |    | 3  |    | 3            | 1  |    | NT             |                                       |
| Linyphiidae | <i>Ceratinops latus</i> (Emerton)                 |        |    |    |    |           |    |    |    | 1            | 1  |    | LB, NT         |                                       |
| Linyphiidae | <i>Ceratinopsis labradorensis</i> (Emerton)       |        |    |    |    |           |    | 39 |    | 2            | 6  |    | NT             |                                       |
| Linyphiidae | <i>Cheniseo sphagnicultor</i> (Bishop & Crosby)   |        |    |    |    |           |    |    |    | 1            |    |    | LB             |                                       |



| Family      | Species                                               | Arctic |    |     |    | Subarctic |    |     |    | North-boreal |    |    |    | New provincial and territorial record |
|-------------|-------------------------------------------------------|--------|----|-----|----|-----------|----|-----|----|--------------|----|----|----|---------------------------------------|
|             |                                                       | BA     | CB | HA  | IQ | CH        | KU | SC  | TO | GB           | MO | NW | YE |                                       |
| Linyphiidae | <i>Mecynargus borealis</i> (Jackson)                  |        |    |     |    | 5         | 7  |     |    |              |    |    |    | MB                                    |
| Linyphiidae | <i>Mecynargus monticola</i> (Holm)                    |        |    |     |    |           | 5  |     |    |              |    |    |    | NU                                    |
| Linyphiidae | <i>Mecynargus paetulus</i> (O.P.-Cambridge)           | 3      |    |     |    |           |    | 3   | 1  |              |    | 5  |    | NU                                    |
| Linyphiidae | <i>Mecynargus sphagnicola</i> (Holm)                  |        |    |     | 4  |           |    | 3   |    |              |    |    |    | NU                                    |
| Linyphiidae | <i>Mecynargus tungusicus</i> (Eskov)                  |        |    |     |    |           |    |     | 1  |              |    |    |    |                                       |
| Linyphiidae | <i>Mermessus entomologicus</i> (Emerton)              |        |    |     |    |           |    |     | 2  |              | 15 |    |    |                                       |
| Linyphiidae | <i>Mermessus tridentatus</i> (Emerton)                |        |    |     |    |           |    |     | 3  |              | 1  |    |    | LB                                    |
| Linyphiidae | <i>Mermessus undulatus</i> (Emerton)                  |        |    |     |    | 6         |    | 2   |    |              | 39 | 2  | 1  |                                       |
| Linyphiidae | <i>Metopobactrus prominulus</i> (O.P.-Cambridge)      |        |    |     |    | 12        | 23 |     | 1  |              |    | 3  |    | MB, NU, YT                            |
| Linyphiidae | <i>Microlinyphia dana</i> (Chamberlin & Ivie)         |        |    |     |    |           |    |     |    |              |    |    | 6  | NT                                    |
| Linyphiidae | <i>Microlinyphia mandibulata</i> (Emerton)            |        |    |     |    |           |    |     |    |              | 1  |    |    |                                       |
| Linyphiidae | <i>Microlinyphia pusilla</i> (Sundevall)              |        |    |     |    |           |    |     |    |              | 1  |    |    |                                       |
| Linyphiidae | <i>Microneta viaria</i> (Blackwall)                   |        |    |     |    |           |    |     |    | 1            |    | 1  |    | NT                                    |
| Linyphiidae | <i>Neriere clathrata</i> (Sundevall)                  |        |    |     |    |           |    |     |    |              |    |    | 1  | NT                                    |
| Linyphiidae | <i>Oedothorax trilobatus</i> (Banks)                  |        |    |     |    |           |    |     | 2  |              | 7  | 19 | 1  | NT                                    |
| Linyphiidae | <i>Oreoneta beringiana</i> (Saaristo & Marusik)       |        |    |     | 5  |           |    |     |    |              |    |    |    | NU                                    |
| Linyphiidae | <i>Oreoneta brunnea</i> (Emerton)                     |        |    |     |    | 1         | 5  | 1   |    |              |    |    |    | MB                                    |
| Linyphiidae | <i>Oreoneta sp.1</i>                                  |        |    |     | 1  |           |    |     |    |              |    |    |    |                                       |
| Linyphiidae | <i>Oreonetides flavescens</i> (Crosby)                |        |    |     |    |           |    |     |    |              | 3  |    |    |                                       |
| Linyphiidae | <i>Oreonetides rectangulatus</i> (Emerton)            |        |    |     |    |           |    |     |    |              | 4  | 1  |    | NT                                    |
| Linyphiidae | <i>Oreonetides vaginatus</i> (Thorell)                |        |    |     |    |           |    |     | 4  |              |    | 3  | 3  |                                       |
| Linyphiidae | <i>Oreophantes recurvatus</i> (Emerton)               |        |    |     |    |           |    |     |    |              | 1  |    |    |                                       |
| Linyphiidae | <i>Pelecopsis mengei</i> (Simon)                      |        |    |     |    |           |    |     |    |              |    | 2  | 3  |                                       |
| Linyphiidae | <i>Perregrinus deformis</i> (Tanasevitch)             |        |    |     |    |           |    |     | 1  |              |    |    | 7  |                                       |
| Linyphiidae | <i>Phlathothrata parva</i> (Kulczyński)               |        |    |     |    |           |    |     |    |              |    | 1  |    |                                       |
| Linyphiidae | <i>Pityohyphantes subarcticus</i> (Chamberlin & Ivie) |        |    |     |    |           |    |     |    |              |    | 2  |    |                                       |
| Linyphiidae | <i>Pocadicnemis americana</i> (Millidge)              |        |    |     |    |           |    |     | 22 |              | 27 | 1  | 22 | 8                                     |
| Linyphiidae | <i>Poeciloneta vakkhanka</i> (Tanasevitch)            |        |    |     |    |           |    |     |    |              |    |    | 1  | YT                                    |
| Linyphiidae | <i>Poeciloneta variegata</i> (Blackwall)              |        |    |     |    | 1         |    |     |    |              |    |    |    | MB                                    |
| Linyphiidae | <i>Praestigia groenlandica</i> (Holm)                 |        | 28 |     | 62 |           |    | 141 |    |              |    |    |    |                                       |
| Linyphiidae | <i>Praestigia kulczynskii</i> (Eskov)                 |        | 1  |     | 11 | 1         |    |     |    |              | 11 | 5  | 13 | NU                                    |
| Linyphiidae | <i>Satilatlas carens</i> (Millidge)                   |        |    |     |    |           |    | 6   |    |              |    |    |    | NU                                    |
| Linyphiidae | <i>Satilatlas gertschi</i> (Millidge)                 |        |    |     |    |           |    |     |    |              |    |    | 1  |                                       |
| Linyphiidae | <i>Satilatlas marxi</i> (Keyserling)                  |        |    |     |    | 2         |    |     |    |              |    |    |    |                                       |
| Linyphiidae | <i>Sciastes dubius</i> (Hackman)                      |        |    |     |    |           |    |     | 1  |              |    |    |    |                                       |
| Linyphiidae | <i>Sciastes mentasta</i> (Chamberlin & Ivie)          |        |    |     |    |           |    |     |    |              |    | 2  |    | NT                                    |
| Linyphiidae | <i>Sciastes truncatus</i> (Emerton)                   |        |    |     |    |           |    |     | 1  |              |    | 16 | 2  |                                       |
| Linyphiidae | <i>Scironis tarsalis</i> (Emerton)                    |        |    |     |    |           |    |     |    |              |    | 10 |    | NT                                    |
| Linyphiidae | <i>Scotinotylus pallidus</i> (Emerton)                |        |    |     |    |           |    |     |    |              | 2  |    |    | LB                                    |
| Linyphiidae | <i>Scotinotylus sacer</i> (Crosby)                    |        |    |     |    |           |    |     | 3  |              |    | 3  | 4  |                                       |
| Linyphiidae | <i>Scyletria inflata</i> (Bishop & Crosby)            |        |    |     |    |           |    |     |    |              |    | 75 |    |                                       |
| Linyphiidae | <i>Semljicola beringianus</i> (Eskov)                 | 243    | 3  |     | 16 |           |    |     |    |              |    |    | 2  | YT                                    |
| Linyphiidae | <i>Semljicola obtusus</i> (Emerton)                   |        |    |     |    | 1         |    | 6   |    |              |    |    |    | MB                                    |
| Linyphiidae | <i>Silometopoides pampia</i> (Chamberlin)             |        | 6  | 160 | 2  |           |    |     |    |              |    |    | 2  |                                       |
| Linyphiidae | <i>Sisicottus montanus</i> (Emerton)                  |        |    |     |    |           |    |     |    |              |    | 15 |    |                                       |
| Linyphiidae | <i>Sisicottus quoylei</i> (Miller)                    |        |    |     |    |           |    |     | 1  |              |    |    |    |                                       |

| Family      | Species                                                   | Arctic |     |    |    | Subarctic |    |     |    | North-boreal |    |     |     | New provincial and territorial record |
|-------------|-----------------------------------------------------------|--------|-----|----|----|-----------|----|-----|----|--------------|----|-----|-----|---------------------------------------|
|             |                                                           | BA     | CB  | HA | IQ | CH        | KU | SC  | TO | GB           | MO | NW  | YE  |                                       |
| Linyphiidae | <i>Sisicus penifusifer</i> (Bishop & Crosby)              |        |     |    |    |           |    |     |    | 1            |    |     |     |                                       |
| Linyphiidae | <i>Sisus rotundus</i> (Emerton)                           |        |     |    |    |           |    | 19  |    |              | 9  |     |     | NT                                    |
| Linyphiidae | <i>Stemonyphantes blauveltae</i> (Gertsch)                |        |     |    |    |           |    |     |    |              |    | 4   |     |                                       |
| Linyphiidae | <i>Styloctetor compar</i> (Westring)                      |        |     |    |    |           |    |     |    | 18           | 17 | 9   |     |                                       |
| Linyphiidae | <i>Tapinocyba bicarinata</i> (Emerton)                    |        |     |    |    | 1         |    | 24  |    | 7            | 1  | 3   | 19  |                                       |
| Linyphiidae | <i>Tapinocyba minuta</i> (Emerton)                        |        |     |    |    |           |    | 29  |    | 14           | 1  | 8   | 6   | LB                                    |
| Linyphiidae | <i>Tapinocyba simplex</i> (Emerton)                       |        |     |    |    |           |    | 2   |    | 3            |    | 1   |     | NT                                    |
| Linyphiidae | <i>Tapinocyba sp.1</i>                                    |        |     |    |    |           |    | 1   |    |              |    |     |     |                                       |
| Linyphiidae | <i>Tarsiphantes latithorax</i> (Strand)                   | 13     | 1   | 16 |    |           | 4  |     |    |              |    |     |     |                                       |
| Linyphiidae | <i>Tennesseellum formica</i> (Emerton)                    |        |     |    |    |           |    |     |    |              |    |     | 3   | NT                                    |
| Linyphiidae | <i>Tenuiphantes zebra</i> (Emerton)                       |        |     |    |    | 1         |    |     |    |              |    |     |     |                                       |
| Linyphiidae | <i>Tiso aestivus</i> (L.Koch)                             |        |     |    |    |           |    |     |    |              |    | 3   |     | NT                                    |
| Linyphiidae | <i>Tmeticus ornatus</i> (Emerton)                         |        |     |    |    |           |    |     |    |              | 1  |     |     |                                       |
| Linyphiidae | <i>Tunagyna debilis</i> (Banks)                           |        |     |    |    |           |    | 1   |    | 2            | 2  |     |     |                                       |
| Linyphiidae | <i>Vermontia thoracica</i> (Emerton)                      |        |     |    |    |           |    |     | 3  | 1            | 1  | 4   | 2   | YT, LB                                |
| Linyphiidae | <i>Wabasso cacuminatus</i> (Millidge)                     |        |     |    |    |           |    |     |    | 63           |    |     | 1   |                                       |
| Linyphiidae | <i>Wabasso quaestio</i> (Chamberlin)                      |        |     |    |    | 12        |    | 2   |    |              |    | 8   | 3   | NT                                    |
| Linyphiidae | <i>Walckenaeria arctica</i> (Millidge)                    |        |     |    |    |           |    | 4   |    | 2            | 4  | 2   | 1   |                                       |
| Linyphiidae | <i>Walckenaeria atrotibialis</i> (O.P.-Cambridge)         |        |     |    |    |           |    |     |    |              |    | 1   |     |                                       |
| Linyphiidae | <i>Walckenaeria auranticeps</i> (Emerton)                 |        |     |    |    | 5         |    |     |    |              |    |     |     |                                       |
| Linyphiidae | <i>Walckenaeria castanea</i> (Emerton)                    |        |     |    |    |           |    | 2   |    |              | 1  | 1   |     |                                       |
| Linyphiidae | <i>Walckenaeria clavicornis</i> (Emerton)                 | 1      |     |    |    | 1         |    |     |    | 1            |    |     |     | MB                                    |
| Linyphiidae | <i>Walckenaeria clavipalpis</i> (Millidge)                |        |     |    |    |           |    | 7   |    |              |    |     |     |                                       |
| Linyphiidae | <i>Walckenaeria communis</i> (Emerton)                    |        |     |    |    |           |    | 2   |    |              |    | 1   | 3   |                                       |
| Linyphiidae | <i>Walckenaeria cuspidata brevicula</i> (Crosby & Bishop) |        |     |    |    |           |    |     |    | 3            |    | 1   |     | NT                                    |
| Linyphiidae | <i>Walckenaeria directa</i> (O.P.-Cambridge)              |        |     |    |    | 2         |    | 3   |    |              |    | 1   |     |                                       |
| Linyphiidae | <i>Walckenaeria exigua</i> (Millidge)                     |        |     |    |    |           |    |     |    |              |    | 178 | 39  | 4                                     |
| Linyphiidae | <i>Walckenaeria fallax</i> (Millidge)                     |        |     |    |    |           |    |     |    |              |    | 2   |     |                                       |
| Linyphiidae | <i>Walckenaeria fraudatrix</i> (Millidge)                 |        |     |    |    |           |    |     | 1  |              |    |     |     |                                       |
| Linyphiidae | <i>Walckenaeria karpinskii</i> (O.P.-Cambridge)           | 8      | 1   |    |    |           |    | 8   | 54 |              |    |     | 1   |                                       |
| Linyphiidae | <i>Walckenaeria kochi</i> (O.P.-Cambridge)                |        |     |    |    |           |    |     |    |              |    |     | 1   | NT                                    |
| Linyphiidae | <i>Walckenaeria minuta</i> (Emerton)                      |        |     |    |    |           |    | 5   |    |              |    |     |     |                                       |
| Linyphiidae | <i>Walckenaeria pallida</i> (Emerton)                     |        |     |    |    |           |    | 1   |    | 3            |    |     |     | LB                                    |
| Linyphiidae | <i>Walckenaeria palustris</i> (Millidge)                  |        |     |    |    |           |    |     |    | 12           |    |     |     |                                       |
| Linyphiidae | <i>Walckenaeria redneri</i> (Millidge)                    |        |     |    |    |           |    | 3   |    |              |    |     |     |                                       |
| Linyphiidae | <i>Walckenaeria spiralis</i> (Emerton)                    |        |     |    |    | 1         |    | 1   |    |              | 4  | 2   | 2   | NT                                    |
| Linyphiidae | <i>Walckenaeria tibialis</i> (Emerton)                    |        |     |    |    |           |    | 1   |    |              |    |     |     |                                       |
| Linyphiidae | <i>Walckenaeria tricornis</i> (Emerton)                   |        |     |    |    |           |    | 17  |    | 4            |    | 25  | 10  |                                       |
| Linyphiidae | <i>Walckenaeria tumida</i> (Crosby & Bishop)              |        |     |    |    |           |    | 1   |    | 1            |    |     |     | LB                                    |
| Linyphiidae | <i>Walckenaeria vigilax</i> (Blackwall)                   |        |     |    |    |           |    |     |    | 1            |    | 1   |     | YT, NT                                |
| Linyphiidae | <i>Walckenaerianus aimakensis</i> (Wunderlich)            |        |     |    |    |           |    |     |    |              |    | 15  | 25  | NT, ON                                |
| Lycosidae   | <i>Alopecosa aculeata</i> (Clerck)                        |        |     |    |    | 6         |    | 25  | 20 | 404          | 1  | 447 | 154 |                                       |
| Lycosidae   | <i>Alopecosa exasperans</i> (O.P.-Cambridge)              | 304    | 99  |    |    |           |    |     |    |              |    |     |     |                                       |
| Lycosidae   | <i>Alopecosa hirtipes</i> (Kulczyński)                    |        | 431 |    |    | 1         |    | 1   |    |              |    |     |     |                                       |
| Lycosidae   | <i>Alopecosa pictilis</i> (Emerton)                       |        |     |    | 13 |           |    | 168 | 24 |              |    |     |     |                                       |
| Lycosidae   | <i>Arctosa alpigena</i> (Doleschall)                      |        |     |    |    |           |    | 1   | 27 | 2            | 1  | 15  | 10  |                                       |

| Family        | Species                                                  | Arctic |      |     |     | Subarctic |     |     |     | North-boreal |     |     |      | New provincial and territorial record |    |
|---------------|----------------------------------------------------------|--------|------|-----|-----|-----------|-----|-----|-----|--------------|-----|-----|------|---------------------------------------|----|
|               |                                                          | BA     | CB   | HA  | IQ  | CH        | KU  | SC  | TO  | GB           | MO  | NW  | YE   |                                       |    |
| Lycosidae     | <i>Arctosa emertoni</i> (Gertsch)                        |        |      |     |     |           |     |     |     |              |     | 2   |      |                                       |    |
| Lycosidae     | <i>Arctosa insignita</i> (Thorell)                       |        |      |     |     | 6         | 46  | 2   | 25  |              |     | 1   | 2    |                                       |    |
| Lycosidae     | <i>Arctosa raptor</i> (Kulczyński)                       |        |      |     |     | 66        |     | 90  |     |              |     | 60  | 33   | 11                                    |    |
| Lycosidae     | <i>Arctosa rubicunda</i> (Keyserling)                    |        |      |     |     |           |     |     |     |              |     | 8   | 10   | 4                                     | NT |
| Lycosidae     | <i>Hogna frondicola</i> (Emerton)                        |        |      |     |     |           |     |     | 1   |              |     | 8   |      |                                       |    |
| Lycosidae     | <i>Pardosa albomaculata</i> (Emerton)                    |        |      |     |     |           |     |     | 1   |              |     |     |      |                                       |    |
| Lycosidae     | <i>Pardosa algens</i> (Kulczyński)                       | 413    | 2773 |     | 95  |           | 14  | 1   |     |              |     |     |      | 2                                     |    |
| Lycosidae     | <i>Pardosa concinna</i> (Thorell)                        |        |      |     |     | 1564      | 290 | 2   | 757 | 1            | 1   | 18  | 24   |                                       |    |
| Lycosidae     | <i>Pardosa furcifera</i> (Thorell)                       |        |      |     |     | 322       |     | 215 | 73  |              |     |     |      | 10                                    |    |
| Lycosidae     | <i>Pardosa fuscula</i> (Thorell)                         |        |      |     |     | 70        |     | 90  | 1   | 8            | 357 | 154 | 74   |                                       |    |
| Lycosidae     | <i>Pardosa glacialis</i> (Thorell)                       |        |      | 410 | 110 | 7         | 985 |     |     |              |     |     |      |                                       |    |
| Lycosidae     | <i>Pardosa groenlandica</i> (Thorell)                    |        |      |     |     |           |     |     |     |              |     |     |      | 1                                     |    |
| Lycosidae     | <i>Pardosa hyperborea</i> (Thorell)                      |        |      |     |     | 60        |     | 156 | 3   | 425          | 12  | 256 | 18   |                                       |    |
| Lycosidae     | <i>Pardosa labradorensis</i> (Thorell)                   |        |      |     |     |           |     | 8   | 1   |              |     |     |      |                                       | YT |
| Lycosidae     | <i>Pardosa mackenziana</i> (Keyserling)                  |        |      |     |     |           |     | 2   |     |              |     | 59  | 23   |                                       |    |
| Lycosidae     | <i>Pardosa modica</i> (Blackwall)                        |        |      |     |     |           |     |     |     |              |     | 4   |      |                                       | NT |
| Lycosidae     | <i>Pardosa moesta</i> (Banks)                            |        |      |     |     |           |     |     | 59  | 1            | 775 | 199 | 1282 |                                       |    |
| Lycosidae     | <i>Pardosa podhorskii</i> (Kulczyński)                   |        |      |     |     |           | 95  |     | 2   |              |     |     |      |                                       |    |
| Lycosidae     | <i>Pardosa sodalis</i> (Holm)                            |        |      |     |     |           | 273 |     | 5   |              |     |     |      |                                       | NU |
| Lycosidae     | <i>Pardosa uintana</i> (Gertsch)                         |        |      |     |     | 1         |     | 20  |     | 3            |     | 17  | 3    |                                       |    |
| Lycosidae     | <i>Pardosa xerampelina</i> (Keyserling)                  |        |      |     |     |           |     |     |     | 1            | 3   | 71  | 117  | 7                                     |    |
| Lycosidae     | <i>Pirata bryantae</i> (Kurata)                          |        |      |     |     |           |     | 4   |     |              | 2   | 5   |      |                                       |    |
| Lycosidae     | <i>Pirata piraticus</i> (Clerck)                         |        |      |     |     | 12        |     | 22  |     |              | 194 | 15  | 2    |                                       |    |
| Lycosidae     | <i>Piratula canadensis</i> (Dondale & Redner)            |        |      |     |     |           |     |     |     |              | 14  |     |      |                                       |    |
| Lycosidae     | <i>Piratula cantralli</i> (Wallace & Exline)             |        |      |     |     |           |     | 81  |     | 7            | 58  | 6   |      |                                       | LB |
| Lycosidae     | <i>Trebacosa marxi</i> (Stone)                           |        |      |     |     |           |     |     |     |              | 1   |     |      |                                       |    |
| Lycosidae     | <i>Trochosa terricola</i> (Thorell)                      |        |      |     |     |           |     |     |     | 13           | 9   |     |      |                                       |    |
| Philodromidae | <i>Philodromus cespitum</i> (Walckenaer)                 |        |      |     |     |           |     |     |     |              |     |     |      | 1                                     |    |
| Philodromidae | <i>Rhysodromus alascensis</i> (Keyserling)               |        |      |     |     |           |     |     | 1   |              |     |     |      |                                       |    |
| Philodromidae | <i>Thanatus arcticus</i> (Thorell)                       |        |      |     |     | 57        | 12  | 1   | 26  |              |     | 4   | 7    |                                       | QC |
| Philodromidae | <i>Thanatus formicinus</i> (Clerck)                      |        |      |     |     |           |     |     | 1   |              |     |     |      |                                       |    |
| Philodromidae | <i>Thanatus striatus</i> (C.L.Koch)                      |        |      |     |     |           |     |     |     |              |     | 4   | 15   |                                       |    |
| Philodromidae | <i>Tibellus maritimus</i> (Menge)                        |        |      |     |     |           |     |     |     |              | 6   | 3   | 2    | 6                                     |    |
| Philodromidae | <i>Tibellus oblongus</i> (Walckenaer)                    |        |      |     |     |           |     |     |     |              |     | 1   |      |                                       |    |
| Pisauridae    | <i>Dolomedes striatus</i> (Giebel)                       |        |      |     |     |           |     |     |     |              | 9   | 2   |      |                                       |    |
| Pisauridae    | <i>Dolomedes triton</i> (Walckenaer)                     |        |      |     |     |           |     |     |     |              |     | 1   |      |                                       |    |
| Salticidae    | <i>Chalcoscirtus alpicola</i> (L.Koch)                   |        |      |     |     |           |     |     |     |              |     |     |      | 1                                     | NT |
| Salticidae    | <i>Evarcha prozyskii</i> (Marusik & Logunov)             |        |      |     |     |           |     |     |     |              |     |     | 6    | 8                                     |    |
| Salticidae    | <i>Habronattus borealis</i> (Banks)                      |        |      |     |     |           |     |     |     |              |     |     | 1    |                                       | NT |
| Salticidae    | <i>Pelegrina montana</i> (Emerton)                       |        |      |     |     |           |     |     |     |              | 3   |     |      |                                       |    |
| Salticidae    | <i>Pellenes lapponicus</i> (Sundevall)                   |        |      |     |     |           |     |     |     |              |     |     | 11   |                                       | NT |
| Salticidae    | <i>Phidippus whitmani</i> (Peckham & Peckham)            |        |      |     |     |           |     |     |     |              |     |     | 1    | 2                                     | NT |
| Salticidae    | <i>Sittiflor cutleri</i> (Prószyński)                    |        |      |     |     |           |     |     |     |              |     |     | 1    |                                       |    |
| Salticidae    | <i>Sittiflor floricola palustris</i> (Peckham & Peckham) |        |      |     |     |           |     |     | 1   |              |     |     |      |                                       |    |
| Salticidae    | <i>Sittiflor striatus</i> (Emerton)                      |        |      |     |     | 2         |     | 1   |     |              |     |     | 1    |                                       | NT |
| Salticidae    | <i>Sittisax ranieri</i> (Peckham & Peckham)              |        |      |     |     | 3         |     | 1   | 1   | 1            |     | 12  | 10   |                                       |    |
